# Supplementary material
Source: Elsevier journal article supplement (https://discovery-pp.ucl.ac.uk/1475728/6/mmc1.pdf)
Supplement: mmc1 [file mmc1.pdf]

Supplementary Table 1. Mean standard deviation differences in hormone concentrations (95% CI) at age 60–64 years between the hypothetical lowest and highest socioeconomic position (relative index of inequality).

|                           | Total testosterone   | P       | SHBG                 | P    | IGF-II                  | P    |
|---------------------------|----------------------|---------|----------------------|------|-------------------------|------|
| <b>Men</b>                |                      |         |                      |      |                         |      |
| Paternal occ. class (4y)  | -0.15 (-0.39, 0.9)   | 0.22#   | -0.05 (-0.28, 0.18)  | 0.70 | -0.14 (-0.38, 0.09)     | 0.23 |
| Own education (26y)       | -0.40 (-0.65, -0.15) | <0.001# | -0.18 (-0.42, 0.05)  | 0.12 | -0.26 (-0.50, -0.02)    | 0.04 |
| Occupational class (53y)  | -0.18 (-0.44, 0.08)  | 0.17    | -0.09 (-0.33, 0.16)  | 0.49 | -0.12 (-0.37, 0.14)     | 0.36 |
| Household income (60-64y) | -0.36 (-0.60, -0.12) | <0.01#  | -0.12 (-0.35, 0.11)  | 0.30 | -0.14 (-0.37, 0.10)     | 0.25 |
| <b>Women</b>              |                      |         |                      |      |                         |      |
| Paternal occ. class (4y)  | 0.22 (0.02, 0.42)    | 0.04    | -0.25 (-0.46, -0.04) | 0.02 | -0.04 (-0.27, 0.20)     | 0.76 |
| Own education (26y)       | 0.06 (-0.14, 0.27)   | 0.55    | -0.16 (-0.38, 0.06)  | 0.16 | -0.10 (-0.34, 0.15)     | 0.45 |
| Occupational class (53y)  | 0.08 (-0.14, 0.30)   | 0.49    | -0.12 (-0.35, 0.10)  | 0.28 | 0.02 (-0.24, 0.27)      | 0.88 |
| Household income (60-64y) | -0.01 (-0.22, 0.19)  | 0.93    | -0.07 (-0.28, 0.14)  | 0.51 | -0.14 (-0.37, 0.10)     | 0.26 |
|                           | IGFBP3               | P       | Morning cortisol     | P    | Diurnal cortisol (drop) | P    |
| <b>Men</b>                |                      |         |                      |      |                         |      |
| Paternal occ. class (4y)  | 0.12 (-0.12, 0.37)   | 0.31    | 0.09 (-0.08, 0.26)   | 0.30 | 0.01 (-0.17, 0.14)      | 0.86 |
| Own education (26y)       | -0.13 (-0.37, 0.12)  | 0.32    | -0.07 (-0.24, 0.10)  | 0.40 | 0.06 (-0.09, 0.22)      | 0.43 |
| Occupational class (53y)  | 0.14 (-0.12, 0.40)   | 0.29    | 0.15 (-0.02, 0.33)   | 0.09 | -0.03 (-0.19, 0.13)     | 0.70 |
| Household income (60-64y) | -0.25 (-0.49, -0.01) | 0.04    | -0.10 (-0.27, 0.06)  | 0.22 | 0.14 (-0.01, 0.29)      | 0.08 |
| <b>Women</b>              |                      |         |                      |      |                         |      |
| Paternal occ. class (4y)  | -0.17 (-0.40, 0.07)  | 0.17    |                      |      |                         |      |
| Own education (26y)       | -0.17 (-0.42, 0.08)  | 0.18    |                      |      |                         |      |
| Occupational class (53y)  | -0.16 (-0.41, 0.09)  | 0.21    |                      |      |                         |      |
| Household income (60-64y) | -0.23 (-0.46, 0.00)  | 0.05    |                      |      |                         |      |

Notes: positive coefficients indicate that those of lower SEP tended to have higher hormone concentrations; #P-value for sex interaction term <0.05; occupational class was that of the highest in the household and derived using the Registrar General's classification; N = 752 men, 745 women for total testosterone – those for other hormones differ slightly (see text).
